# Supplementary material
Source: PubMed Central journal article supplement (PMC6901355)
Supplement: EMS85039-supplement-Supplementary_Figures.pdf [file EMS85039-supplement-Supplementary_Figures.pdf]

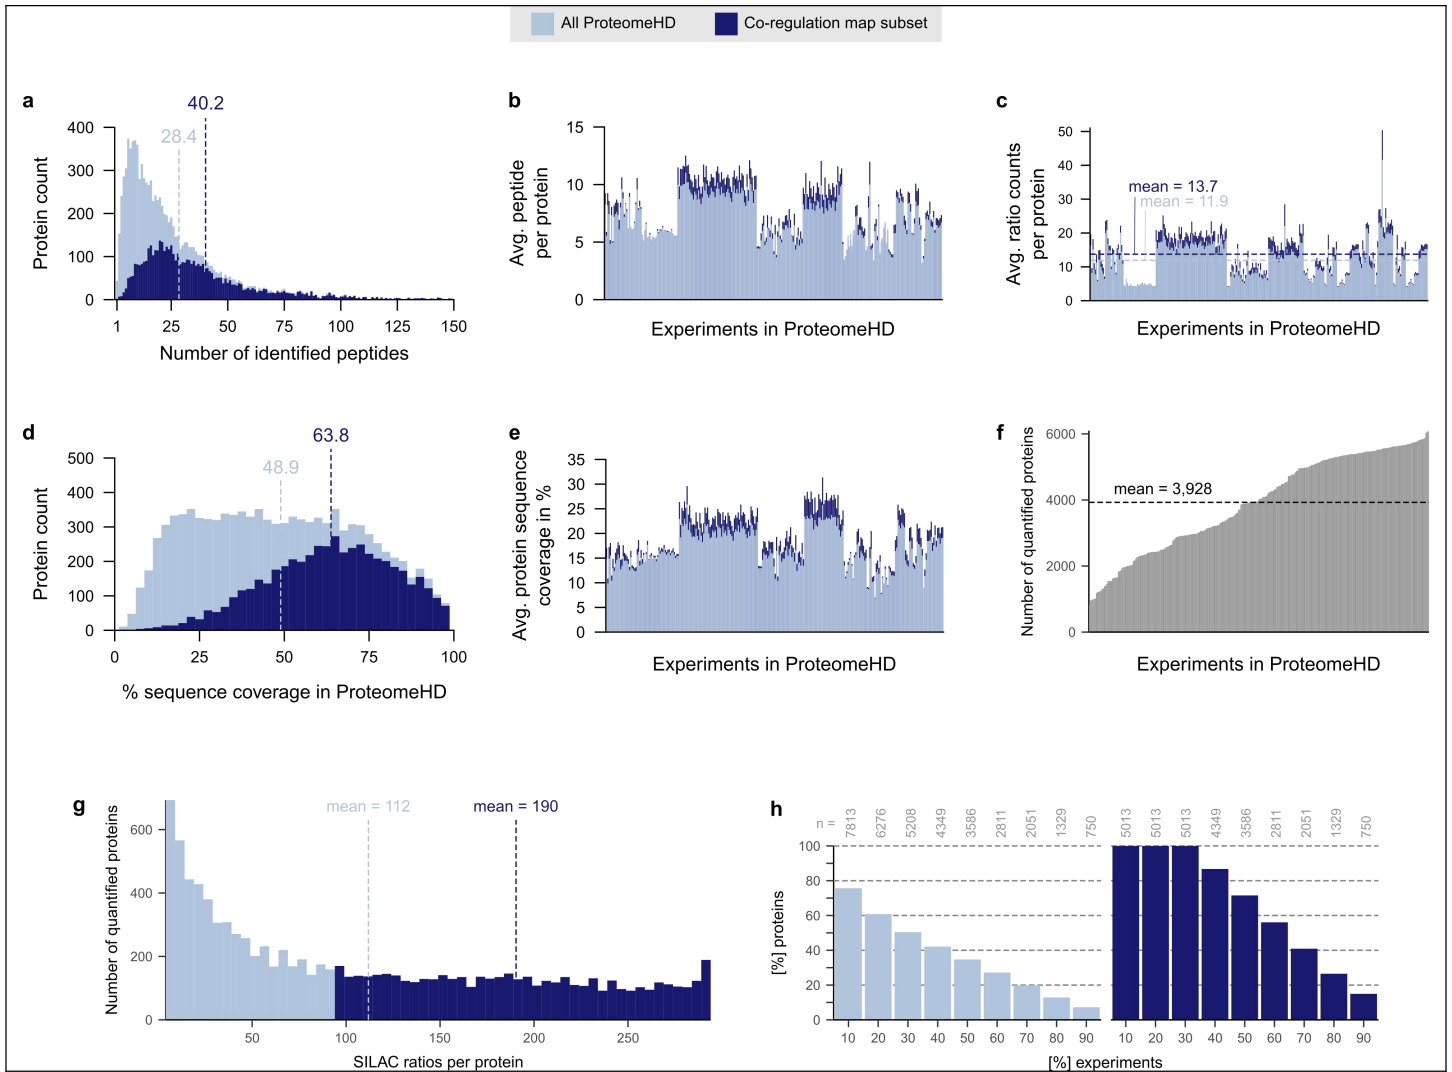

## Supplementary Figure 1

### Peptide and protein quantitation statistics in ProteomeHD

(a) Histogram showing the number of peptides identified per protein in ProteomeHD (10,323 proteins, light blue) and in the subset of ProteomeHD used to make the co-regulation map (5,013 proteins, dark blue). Dashed lines show the average number of peptides per protein. (b) Number of peptides per protein broken down by experiment. The average peptide number for the proteins detected in each experiment is shown. (c) Average number of SILAC ratio counts (independent observations) per protein, broken down into the 294 input experiments. (d) Sequence coverage of proteins in ProteomeHD. Dashed lines indicate the average. (e) Average sequence coverage of proteins in each input experiment. (f) The number of proteins that were quantified in the 294 experiments of ProteomeHD ranges from 817 to 6,080. The average is 3,928 proteins per SILAC ratio. (g) Number of experiments, i.e. SILAC ratios, in which proteins were quantified. Only proteins that were quantified in at least 95 experiments were used for the co-regulation analysis. On average, proteins in ProteomeHD were quantified in 112 input experiments. The average rises to 190 if only proteins used for the co-regulation analysis are considered. (h) Bar chart showing which fraction of proteins have been detected in which fraction of experiments. For example, 100% of proteins in the co-regulation map have been quantified in at least 30% of the 294 experiments. About 15% of the proteins have been quantified in at least 90% of the experiments.

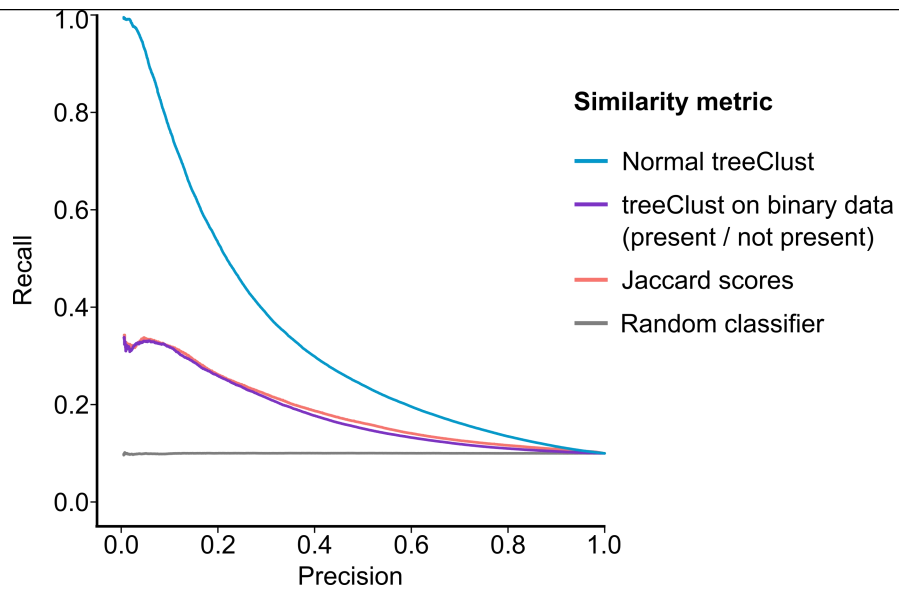

## Supplementary Figure 2

### Impact of co-occurrence on treeClust learning

Performance comparison of a standard treeClust application on ProteomeHD with two types of co-occurrence measures. Jaccard scores are an established co-occurrence measure (protein pairs observed in the same set of experiments would get a Jaccard score of 1, while protein pairs without any overlapping experiments would get a score of 0). We also applied treeClust to a "binary" version of ProteomeHD, where all SILAC ratios were set to 1 and all missing values were set to 0. The precision recall curve uses Reactome as a gold standard. It shows that Jaccard and "binary treeClust" work equally well but both are outperformed by the standard co-regulation analysis. Therefore, while co-occurrence of proteins across ProteomeHD does provide some information about functional associations, quantitative up- and down regulation is a far better indicator of shared protein function, at least for ProteomeHD. Notably, this also shows that treeClust can detect co-occurrence, in principle, if the data are transformed into a binary format.

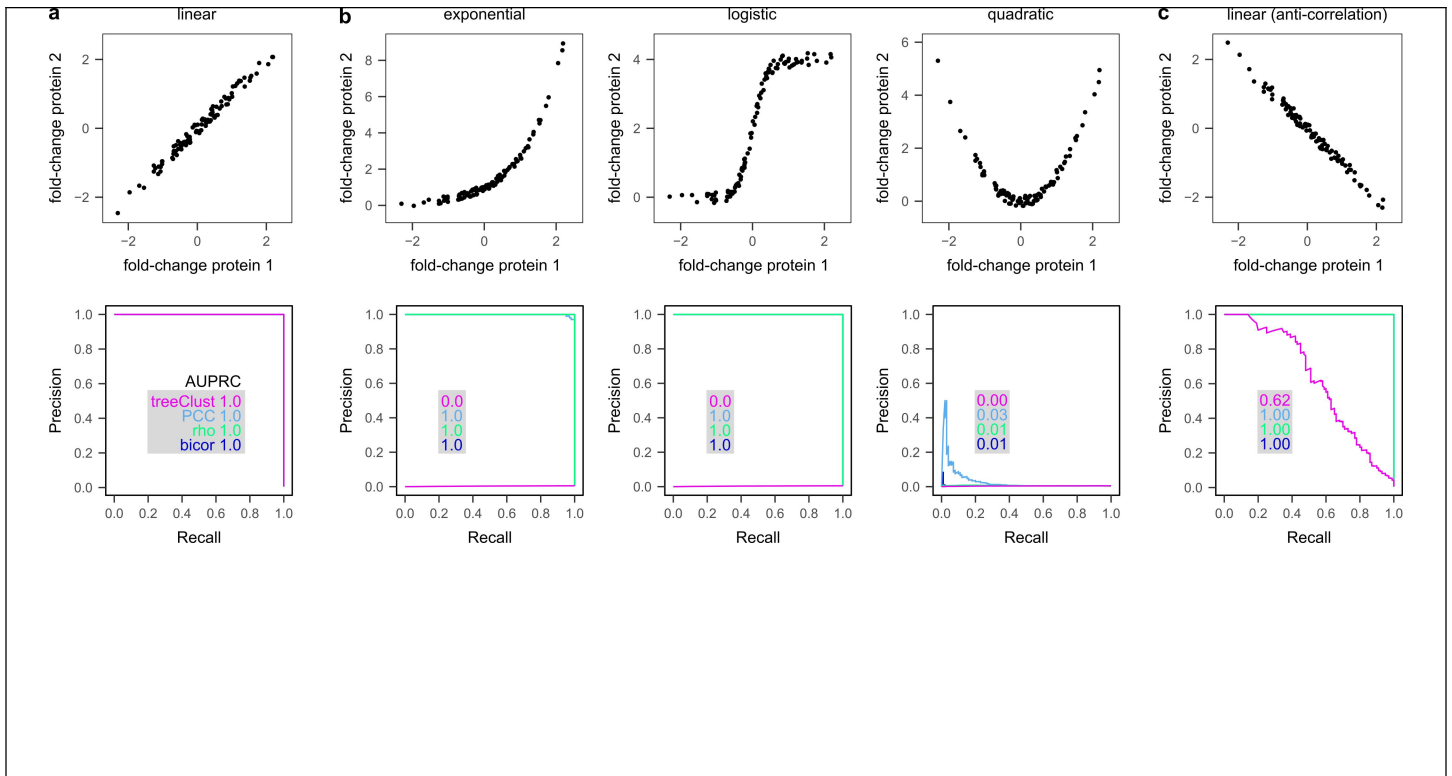

**Supplementary Figure 3**

**treeClust detects specifically positive linear associations**

We tested which types of relationships treeClust detects by using a synthetic dataset consisting of 100 variables and 200 proteins, where 0.5% of all possible protein - protein combination have a defined relationship. (a) Precision - recall (PR) analyses show that treeClust separates linear from random relationships perfectly, resulting in an area under the PR curve (AUPRC) of 1. The same result is observed for the three tested correlation-based metrics: PCC, Spearman's rho and biweight midcorrelation (bicor). The four PR curves overlap fully. (b) TreeClust completely fails to detect exponential or logistic relationships (AUPRC = 0). In contrast, although these pairs receive lower correlation coefficients than linear pairs, they still score high enough with PCC, rho and bicor to be completely separated from the pool of random associations. No metric detects quadratic relationships. (c) Anti-correlations are not identified well by treeClust.

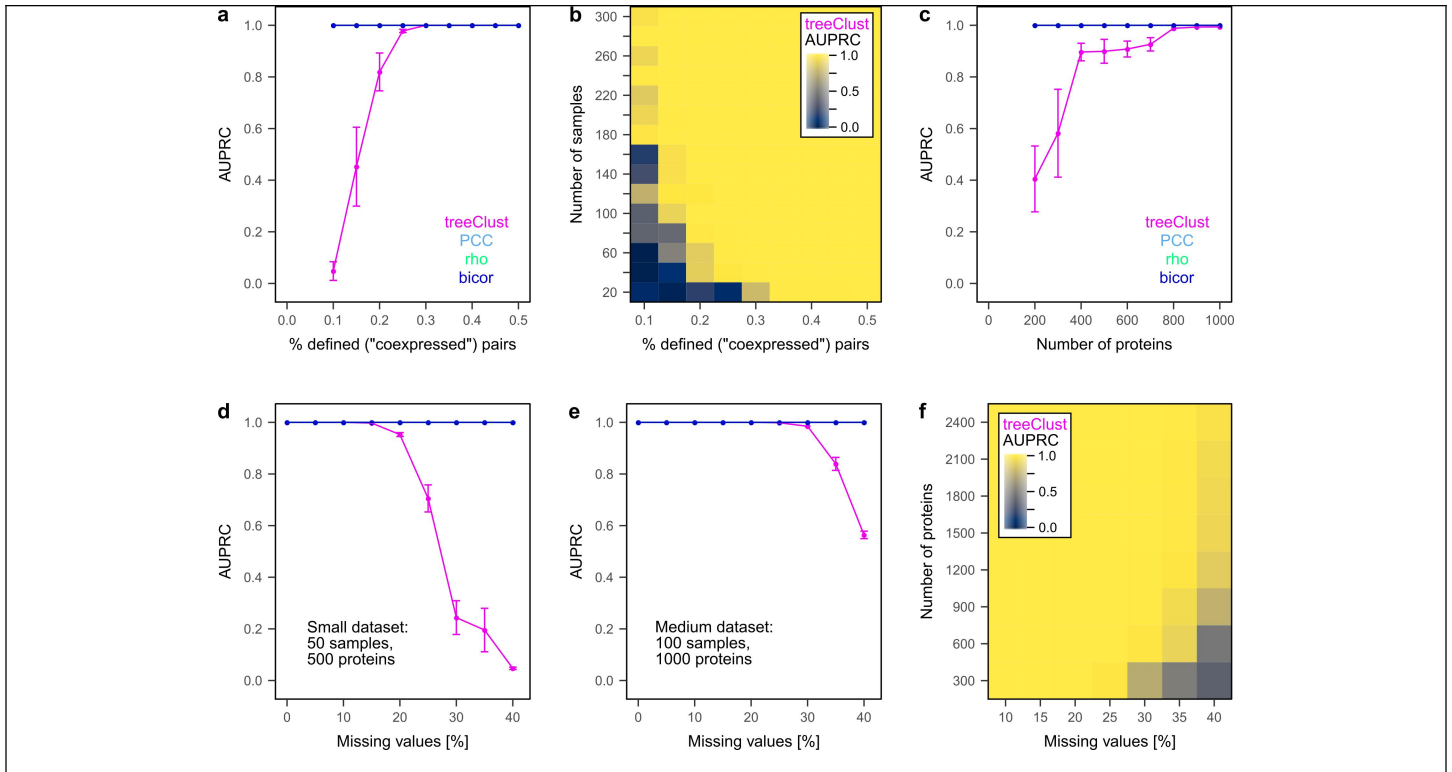

## Supplementary Figure 4

### Impact of data size and missing values on treeClust performance

We used synthetic data to assess the impact of various data characteristics on treeClust performance. This figure complements Figure 2. **(a)** Synthetic datasets of 50 samples and 500 proteins were created with increasing percentage of defined linear relationships. This has no impact on the three correlation metrics (PCC, rho and bicor), so their curves overlap fully at AUPRC 1. Treeclust performance needs > 0.3% linear relationships in the data in order to detect them successfully. Synthetic datasets were created in triplicate. Points show the average area under the precision recall curve (AUPRC) obtained for each setting. Error bars show the standard error of the mean. **(b)** Combinatorial impact of the number of samples and the percentage of defined linear relationships (N proteins = 500). Note that for larger datasets lower percentages of "coexpressed" proteins can be detected. **(c)** TreeClust, but not the three correlation metrics, is also affected by the number of available observations (proteins). N samples = 20, 0.3% linear associations. **(d, e)** Adding missing values to a small (n = 50 samples, n = 500 proteins) and medium (n = 100 samples, n = 1,000 proteins) dataset, respectively, has a different impact on treeClust performance. **(f)** Combinatorial impact of missing values and the number of proteins, showing that for large datasets with many proteins a larger percentage of missing values can be tolerated (N samples = 150).

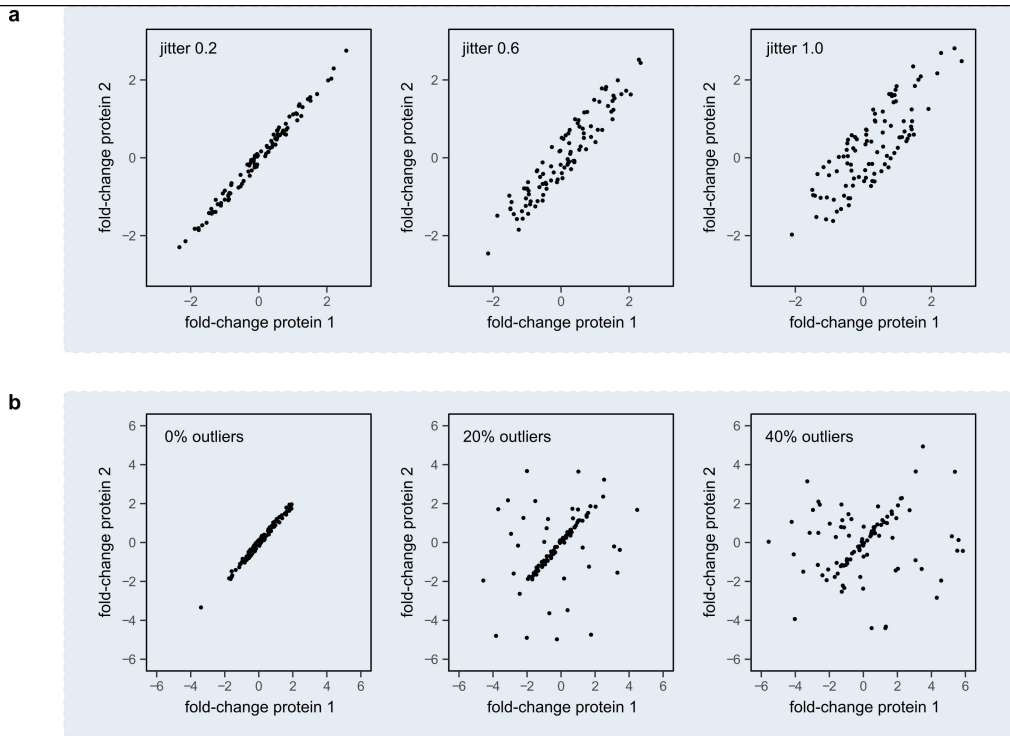

## Supplementary Figure 5

### Illustration of changing the goodness-of-fit and outlier occurrence in synthetic data

This figure illustrates the different conditions tested in Figure 2d, e. **(a)** Scatterplots illustrating the effect of increasing the difference between variables, which decreases treeClust performance but not that of correlation metrics. **(b)** Scatterplots illustrating the effect of adding outlier data points, which decreases treeClust performance less than that of the correlation metrics.

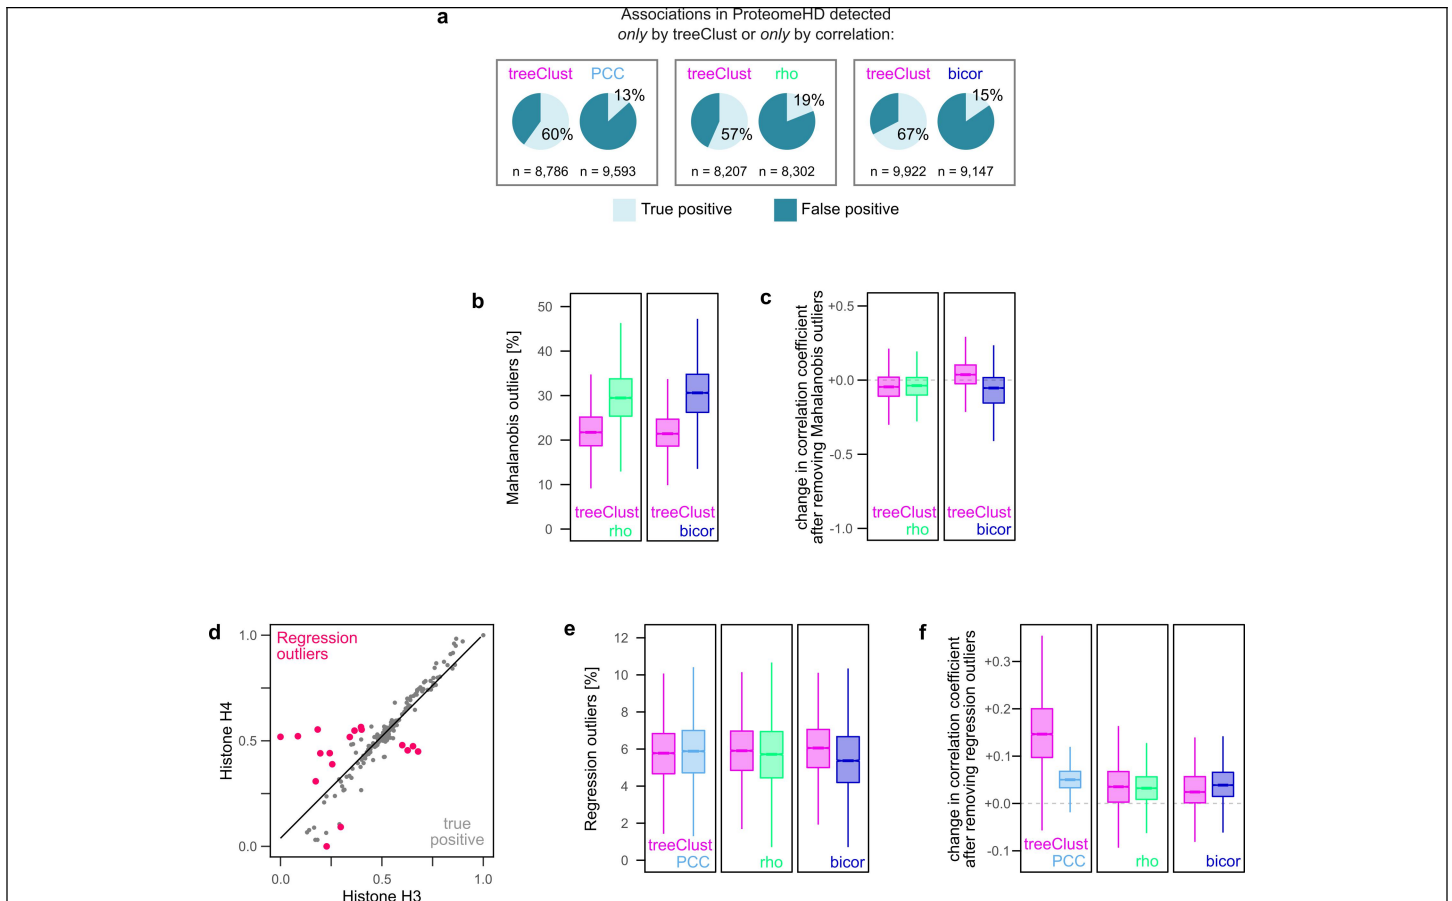

## Supplementary Figure 6

### Outliers in ProteomeHD and their impact on coexpression metrics

(a) Co-regulated protein pairs in ProteomeHD were divided into those detected by treeClust but not by PCC and vice versa. Separate comparisons were made for pairs detected by treeClust but not rho, and treeClust but not bicor. The pairs in the resulting groups were annotated using Reactome into known, biologically relevant interactions (true positives) and pairs that were unlikely to have any biological associations (false positives). Note that treeClust-specific pairs tend to be true positives, whereas correlation-specific pairs tend to be false positives. (b) This panel complements Figure 2f. Outliers were detected in ProteomeHD via their Mahalanobis distance, i.e. these outliers are located far from the bulk of the data, but can be close to the regression line. The boxplots show that Mahalanobis outliers are more frequent in protein pairs detected specifically by rho or bicor as opposed to pairs detected specifically by treeClust. The number of protein pairs shown corresponds to n for each group as indicated in (a). (c) Removing these Mahalanobis outliers has little impact on the PCC of treeClust-, rho- or bicor-specific protein pairs, in contrast to what was observed for Pearson's correlation (see Figure 2g). For number of proteins shown, see panel (a). (d) A second type of outlier - regression outliers - were detected in ProteomeHD via studentized residuals. These outliers are located far away from the regression line and will decrease correlation coefficients. An example of a true association is shown, where regression outliers affect the resulting correlation. Fold-changes have been scaled to lie between 0 and 1. (e) The percentage of regression outliers is very similar in all six groups. See panel (a) for number of proteins shown. (f) Removing regression outliers increases the correlation coefficient (PCC) of protein pairs that were previously detected only by treeClust, suggesting PCC missed some of these pairs because of regression outliers. This is not the case for pairs missed by rho or bicor. See panel (a) for number of proteins shown. For boxplots, lower and upper hinges correspond to the first and third quartiles, and lower and upper whiskers extend to the smallest or largest value no further than  $1.5 \times \text{IQR}$  (inter-quartile range) from the hinge, respectively. Notches give roughly a 95% confidence interval for comparing medians.

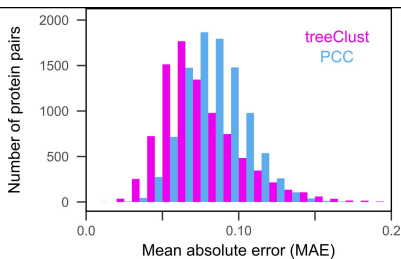

### Supplementary Figure 7

#### Goodness-of-fit partially explains different performance of PCC and treeClust

This figure complements Figure 2i. Systematic comparison of mean absolute errors (MAEs) from protein pairs that scored high with either treeClust or with PCC (see Supplementary Figure S6a;  $n = 8,786$  treeClust-specific protein pairs,  $n = 9,593$  PCC-specific protein pairs). Protein pairs exclusively detected by PCC tend to have somewhat higher MAEs, possibly explaining why they are predominantly false-positive hits, in addition to the impact of outliers.

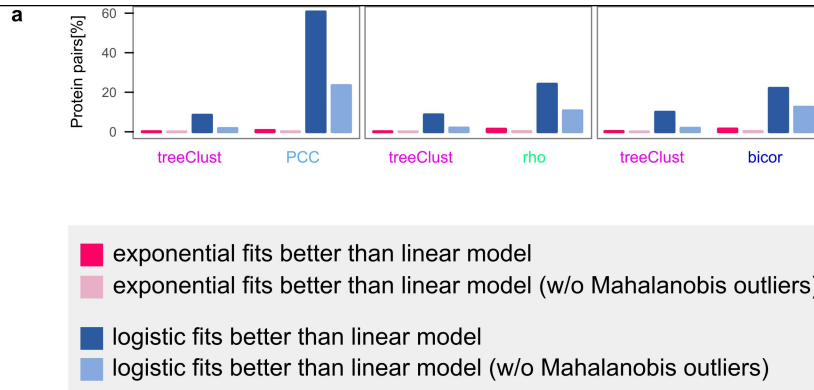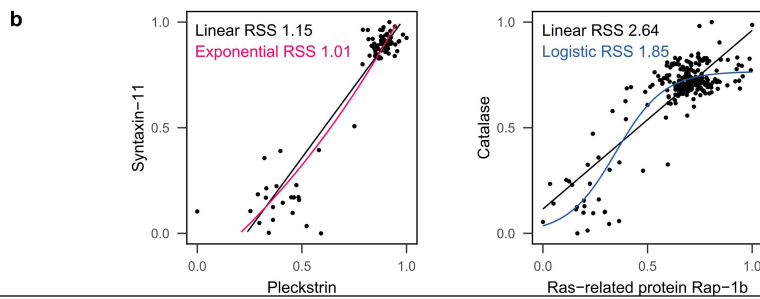

## Supplementary Figure 8

### Lack of genuine non-linear relationships in ProteomeHD

(a) Exponential and logistic (sigmoid) models were fitted to all protein pairs that scored high with treeClust or the three correlation metrics. Model fit was compared through their residual sum of squares (RSS). Exponential models only fitted better than linear ones in rare cases, but logistic models often did. Around half of the protein pairs detected specifically by PCC are better explained by a logistic than a linear model. However, this is mainly driven by Mahalanobis-type outliers. Removing those strongly reduces the number of logistic models outfitting the linear ones. (b) Two example regressions where an exponential (left) or logistic (right) model fits better than a linear one. Note that this clearly reflects overfitting due to outliers rather than genuine non-linear relationships.



**a**

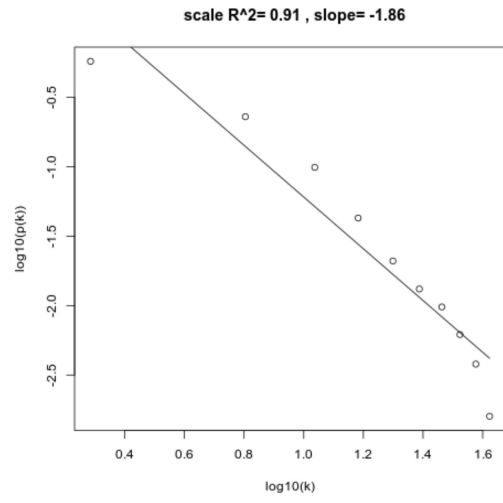

**b**

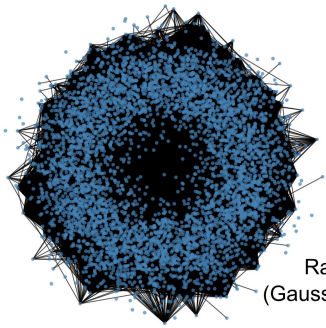

Random  
(Gaussian donut)

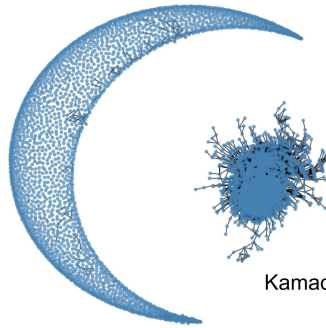

Kamada-Kawai

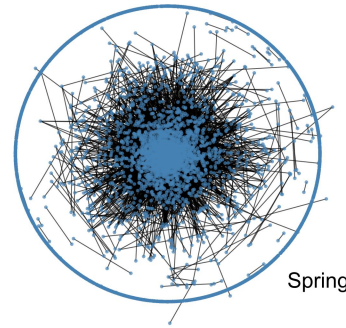

Spring

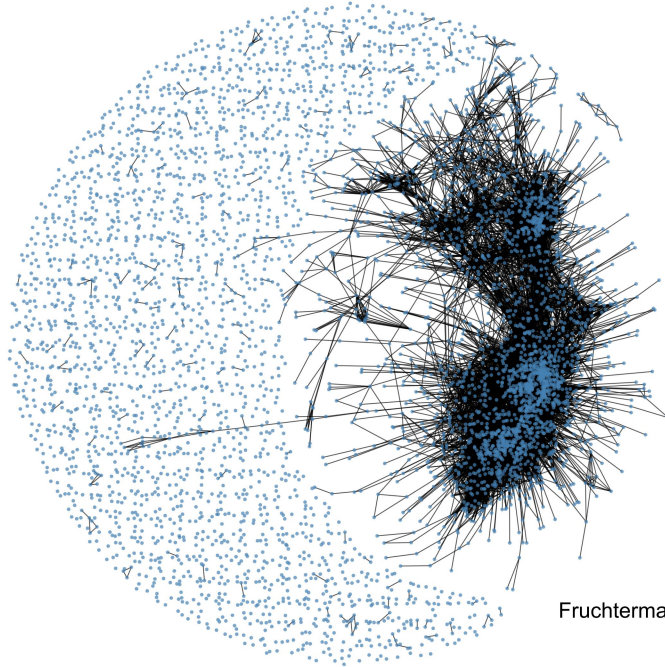

Fruchterman-Reingold

## Supplementary Figure 9

### The protein co-regulation network satisfies scale-free topology but is difficult to visualize as an interaction network

(a) The "scale free plot" produced by the WGCNA R package using the treeClust-derived adjacency matrix. The log of the connectivity  $k$  is plotted against the log of the frequency of this connectivity. There is a linear relationship between these two variables, as indicated by the square of the Pearson correlation,  $R^2$ , being 0.91. This shows that the protein co-regulation network derived from ProteomeHD using treeClust is at least approximately scale free. (b) Visualization of a weighted, undirected network with 5,013 nodes (proteins detected in at least 95 experiments) and 62,812 edges (top scoring 0.5% of links), based on the co-regulation score. Four common algorithms were used to create different network layouts, but with so many edges it is difficult to avoid the "hairball" problem.

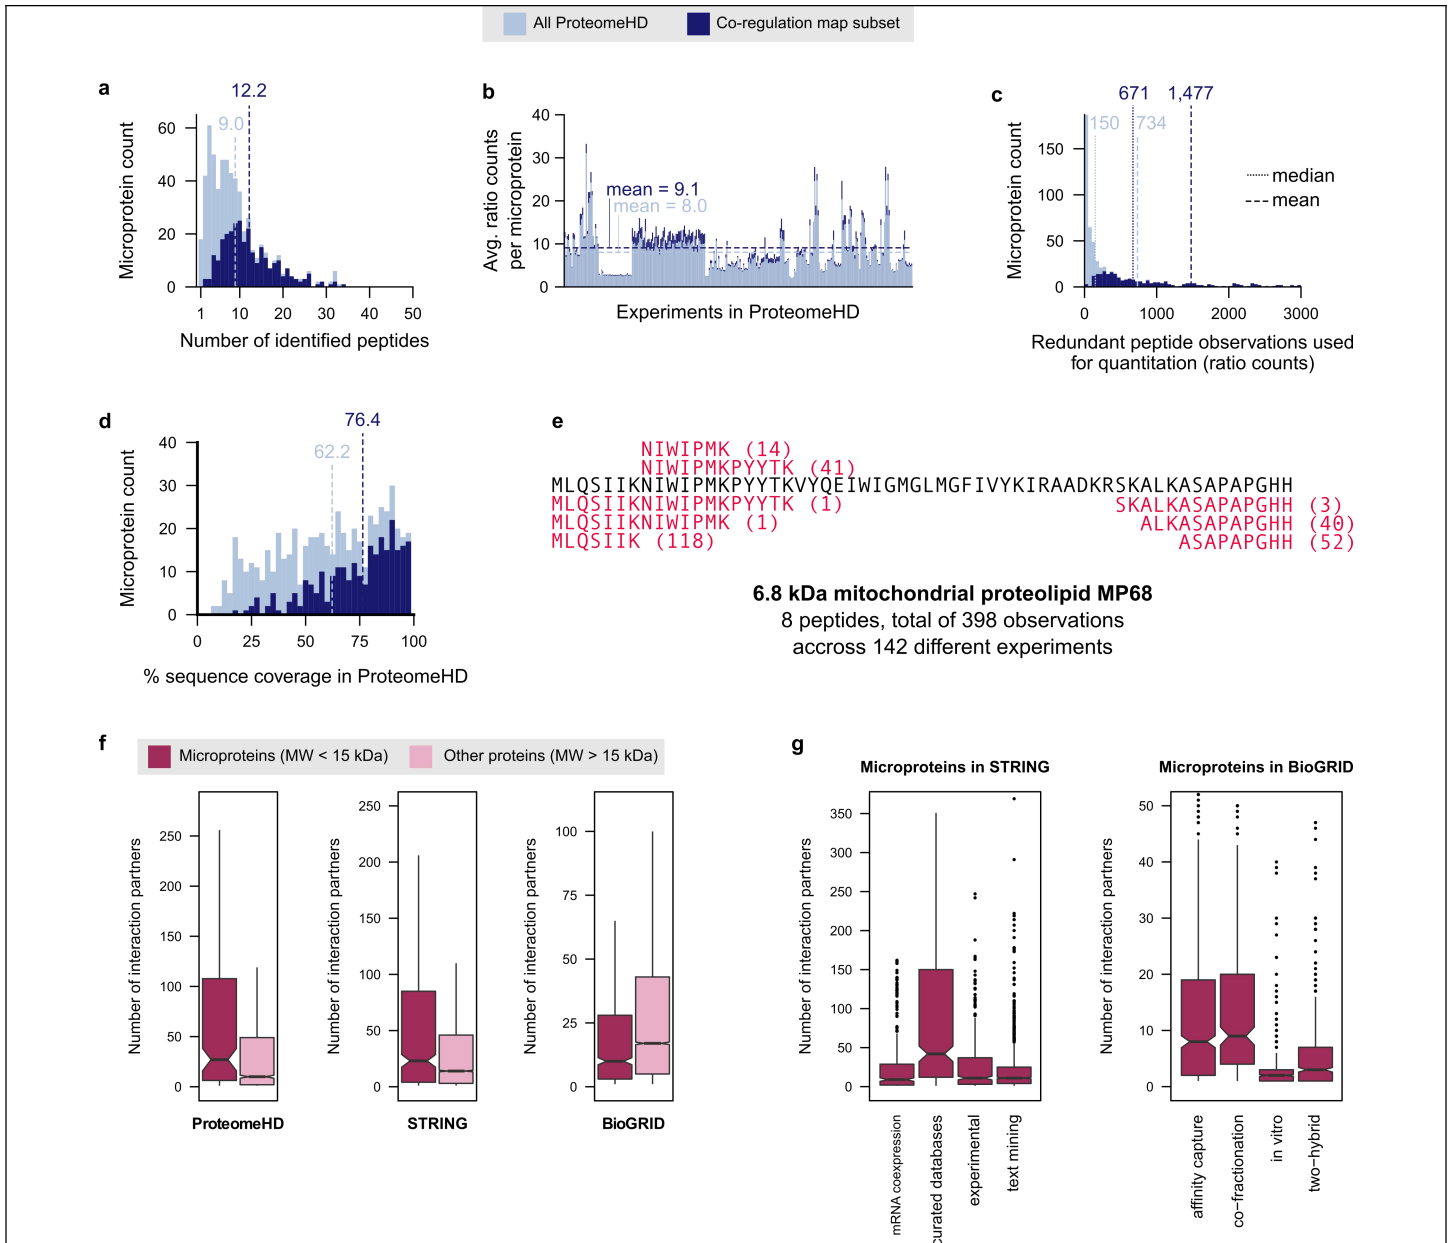

**Supplementary Figure 10**

**Microproteins in ProteomeHD and their connectivity**

(a) Histogram showing the number of peptides identified per microprotein (proteins < 15 kDa) in ProteomeHD and the subset of ProteomeHD used to make the co-regulation map. Dashed lines show the average number of peptides per microprotein. (b) Average number of SILAC ratio counts (independent observations) per microprotein, broken down into the 294 input experiments. (c) Histogram showing the cumulative SILAC ratio counts per microprotein across all experiments in ProteomeHD. (d) Sequence coverage of microproteins in ProteomeHD. Dashed lines indicate the average. (e) The actual peptides for one example microprotein, MP68. The numbers in brackets indicate in how many different experiments each peptide was observed. (f) Microproteins tend to have more co-regulation partners in ProteomeHD than larger proteins (median 27 vs 10 associations; n = 206 microproteins, n = 2505 other proteins). Microproteins also have more functional protein - protein associations according to STRING (median 23 vs 14; n = 521 microproteins, n = 9,261 other proteins). However, larger proteins have considerably more physical interaction partners than microproteins, according to BioGRID (median 10 vs 17; n = 815 microproteins, n = 14,918 other proteins). (g) The number of interaction partners of microproteins identified by STRING and BioGRID, broken down by the evidence type available in each resource (n = 362 microproteins for mRNA coexpression, 481 for curated databases, 505 for experimental, 908 for text mining, 636 for affinity capture, 251 for co-

fractionation, 367 for in vitro and 533 for two-hybrid. We considered STRING interactions with a minimum score of 400 in the individual evidence channels (e.g. mRNA coexpression). Two STRING evidence channels (gene neighborhood and evolutionary co-occurrence) were omitted because they contribute very little. For panel (f) we considered only the most reliable STRING interactions, i.e. those with a combined interaction score above 900. For boxplots, lower and upper hinges correspond to the first and third quartiles, and lower and upper whiskers extend to the smallest or largest value no further than  $1.5 * \text{IQR}$  (inter-quartile range) from the hinge, respectively. Notches give roughly a 95% confidence interval for comparing medians.

ENTER YOUR QUERY PROTEIN:

SEARCH PROTEIN

SCORE CUT-OFF:

SET

Proteins co-regulated with:  
WD repeat-containing protein 46

OPEN MAP IN FULL SCREEN

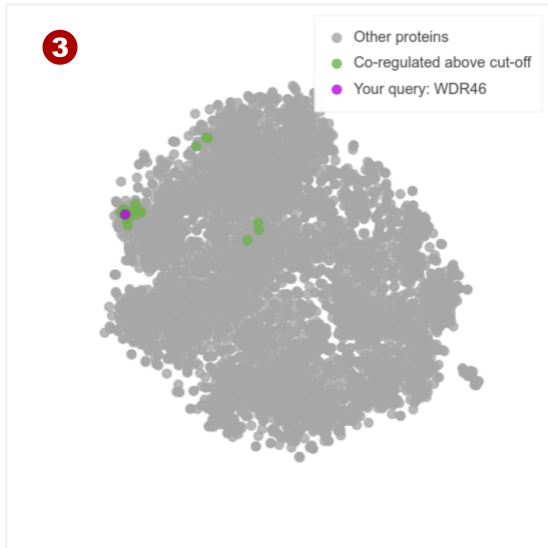

Download coregulated proteins as CSV

Copy shareable link to clipboard

| CO-REGULATED PROTEINS | GO BIO PROCESS | GO SUBCELLULAR                                             | KEGG PATHWAY     |
|-----------------------|----------------|------------------------------------------------------------|------------------|
| Uniprot Acc           | Gene Name      | Protein Name                                               | Percentile Score |
| Q9Y5J1                | UTP18          | U3 small nucleolar RNA-associated protein 18 homolog       | 0.998812         |
| Q9Y3A2                | UTP11          | Probable U3 small nucleolar RNA-associated protein 11      | 0.998661         |
| Q9NQZ2                | UTP3           | Something about silencing protein 10                       | 0.9982           |
| Q8NEJ9-2              | NGDN           | Neuroguidin                                                | 0.998056         |
| Q5QJE6                | DNTTIP2        | Deoxynucleotidyltransferase terminal-interacting protein 2 | 0.997931         |

TRANSFER TO STRING-DB Search:

Behavior of co-regulated proteins in ProteomeHD experiments  
Click in the table above to highlight. Groups of experiments are color-coded.

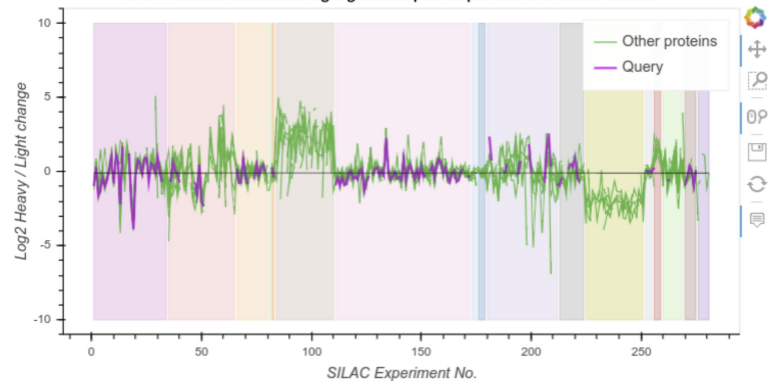

- 1 Search field.** Search for a protein of interest using Uniprot IDs or gene names. Suggestions of proteins that are actually in the map appear upon typing.
- 2 Set co-regulation score cut-off.** Here it is expressed as a percentile score to allow for a more intuitive exploration. For example, a cut-off of 0.9 shows associations that are stronger than 90% of all associations detected in the co-regulation analysis of ProteomeHD. Defaults to 0.995 (showing the top-scoring 0.5% pairs, as in the manuscript).
- 3 Co-regulation map.** Zoom using mouse wheel. Protein names appear when hovering mouse over points. Query protein highlighted in purple, proteins co-regulated with it - above the chosen cut-off - are shown in green. These may not be adjacent to query protein in the map, as they may be co-regulated with other proteins as well.
- 4 Functional characterisation of co-regulation partners.** Shows list of proteins co-regulated with query protein above the selected cut-off. Bottom left button sends the list to STRING. Separate tabs show enrichment of GO terms and KEGG pathways among the co-regulated proteins, together with Bonferroni - adjusted p-values.
- 5 Co-regulation patterns.** Line plots showing up- and down-regulation of the query protein and up to 100 co-regulated proteins across ProteomeHD. Zoom in using mouse wheel. Background colours distinguish different input projects, project names are shown when hovering mouse over them.
- 6 Save the results.** To save or share the results, one can either download a csv file or copy a link that will reproduce the current selection of query protein and score cut-off.

## Layout of [www.proteomeHD.net](http://www.proteomeHD.net)

Screenshot of the core page of [www.proteomeHD.net](http://www.proteomeHD.net), an interactive web-based app to explore co-regulation data. The basic elements are highlighted and explained. Note that the page also contains help and download sections.

- 1 Click network edge
- 2 Select coexpression channel

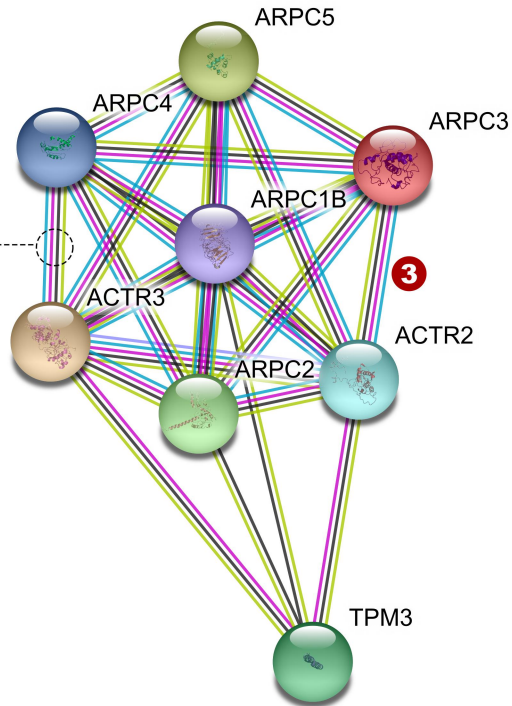

- coexpression
- experimentally / biochemically determined
- association in curated databases
- textmining

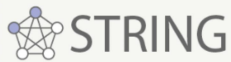

Search Download Help My Data

## GENE COEXPRESSION

Coexpression observed in your query organism (Homo sapiens):

ACTR3 - Actin-related protein 3; Functions as ATP-binding component of the Arp2/3 complex which is involved in regulation of actin polymerization and together with an activating nucleation-promoting factor (NPF) mediates the formation of branched actin networks. Seems to contact the pointed end of the daughter actin filament. Plays a role in ciliogenesis; Belongs to the actin family. ARP3 subfamily

ARPC4 - Actin-related protein 2/3 complex subunit 4; Functions as actin-binding component of the Arp2/3 complex which is involved in regulation of actin polymerization and together with an activating nucleation-promoting factor (NPF) mediates the formation of branched actin networks. Seems to contact the mother actin filament

score of 0.999 based on protein coregulation ([see interaction at ProteomeHD](#))

<https://www.proteomehd.net/proteomehd/highlight/P61158/P59998/0.990000>

Pre-computed link to ProteomeHD

1. Use ACTR3 as query protein (P61158)
2. Highlight ACTR4 in the result table & plot (P59998)
3. Set appropriate score cut-off to show all relevant co-regulation partners (0.990000)

3 combined coexpression score 0.999 based on RNA expression (0.117) and protein coregulation (0.999, [see interaction at ProteomeHD](#))

### Supplementary Figure 12

Integration of co-regulation scores with STRING (<https://string-db.org>)

A typical protein - protein association network in STRING, containing the Arp2/3 complex and tropomyosin 3, both of which are involved in actin cytoskeleton regulation. Network edges are colour-coded by the type of evidence available for the association. Protein co-regulation information is embedded in the gene coexpression channel. The channel view shows the channel-specific STRING score, a re-calibrated version of our co-regulation score. It also contains a pre-computed link to [www.proteomeHD.net](http://www.proteomeHD.net), which uses the first protein as ProteomeHD query and highlights the second protein in the results. If more than one protein isoform is available in ProteomeHD, STRING will link to the alphabetically first isoform, which is generally the main one. The link also contains a cut-off setting to match the ProteomeHD cut-off to the equivalent one selected by the user in STRING. In cases where both mRNA coexpression and protein co-regulation evidence is available for an association, their relative contribution to the STRING coexpression score is indicated (shown here as point 3).



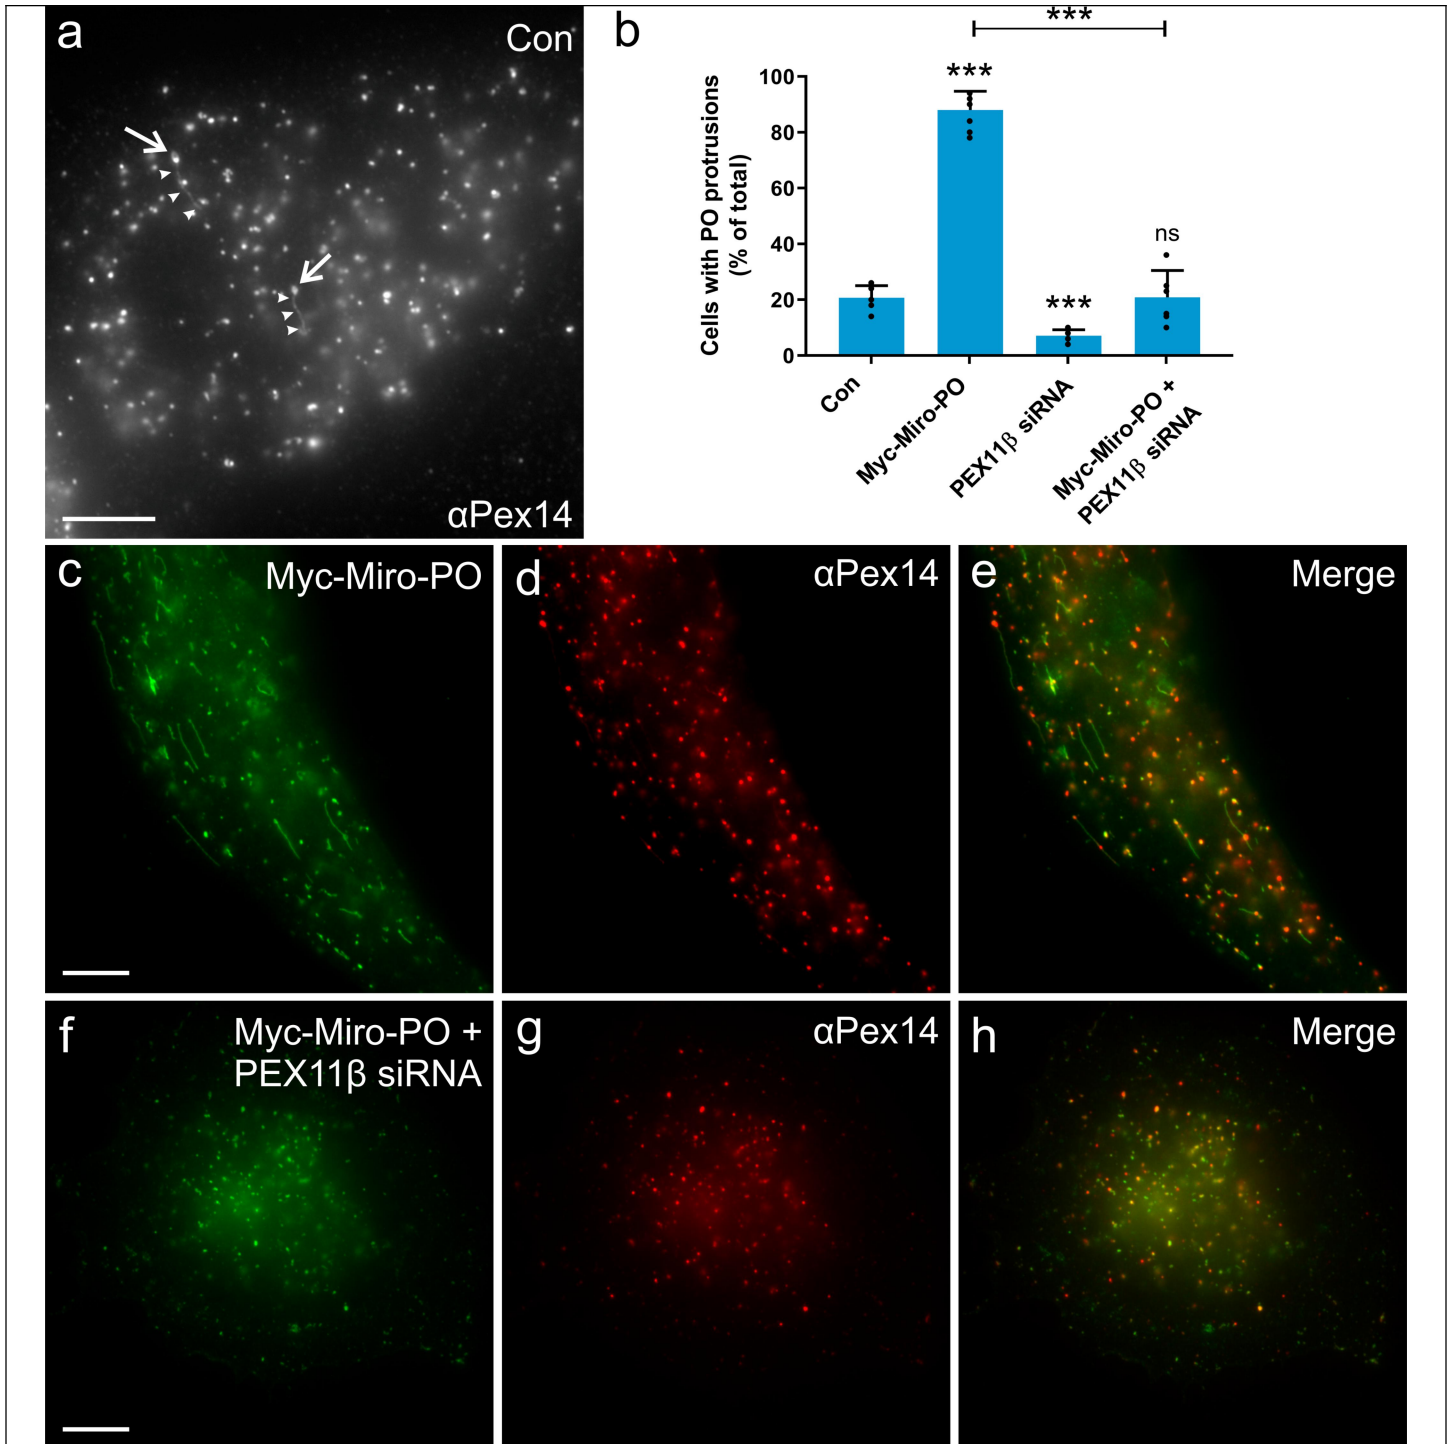

Supplementary Figure 13

#### MIRO1-induced peroxisomal membrane protrusions depend on PEX11β

(a-h) PEX5-deficient human skin fibroblasts were mock-treated (control), or transfected with Myc-Miro-PO, a peroxisome-targeted Miro1 variant, in the presence of control- or PEX11β-specific siRNA. Cells were processed for immunofluorescence using anti-Myc and anti-PEX14 antibodies (peroxisomal marker). Results are representative of three independent experiments. (b) Quantification of cells with peroxisomal protrusions. The average result of 3 independent experiments is shown, error bars indicate the mean +/- standard deviation. (a, b) Control cells occasionally contain peroxisomes with membrane protrusions (< 5 per cell; up to 5 μm in length). (c-e, b

Myc-Miro-PO induces the formation of peroxisomal membrane protrusions (> 5 per cell; > 5  $\mu\text{m}$  in length). Results are representative of three independent experiments. **(f-h, b)** Silencing of PEX11 $\beta$  by siRNA significantly reduces the number of cells with peroxisomal membrane protrusions in controls and Myc-Miro-PO expressing cells. Results are representative of three independent experiments. Globular peroxisomes (arrows) with membrane protrusions (arrowheads) in (a) are highlighted. \*\*\*  $P < 0.001$ ; \*\*  $P < 0.01$  from a two-tailed unpaired t test; ns, not significant ( $p = 0.9695$ ). Scale bars, 10  $\mu\text{m}$ .

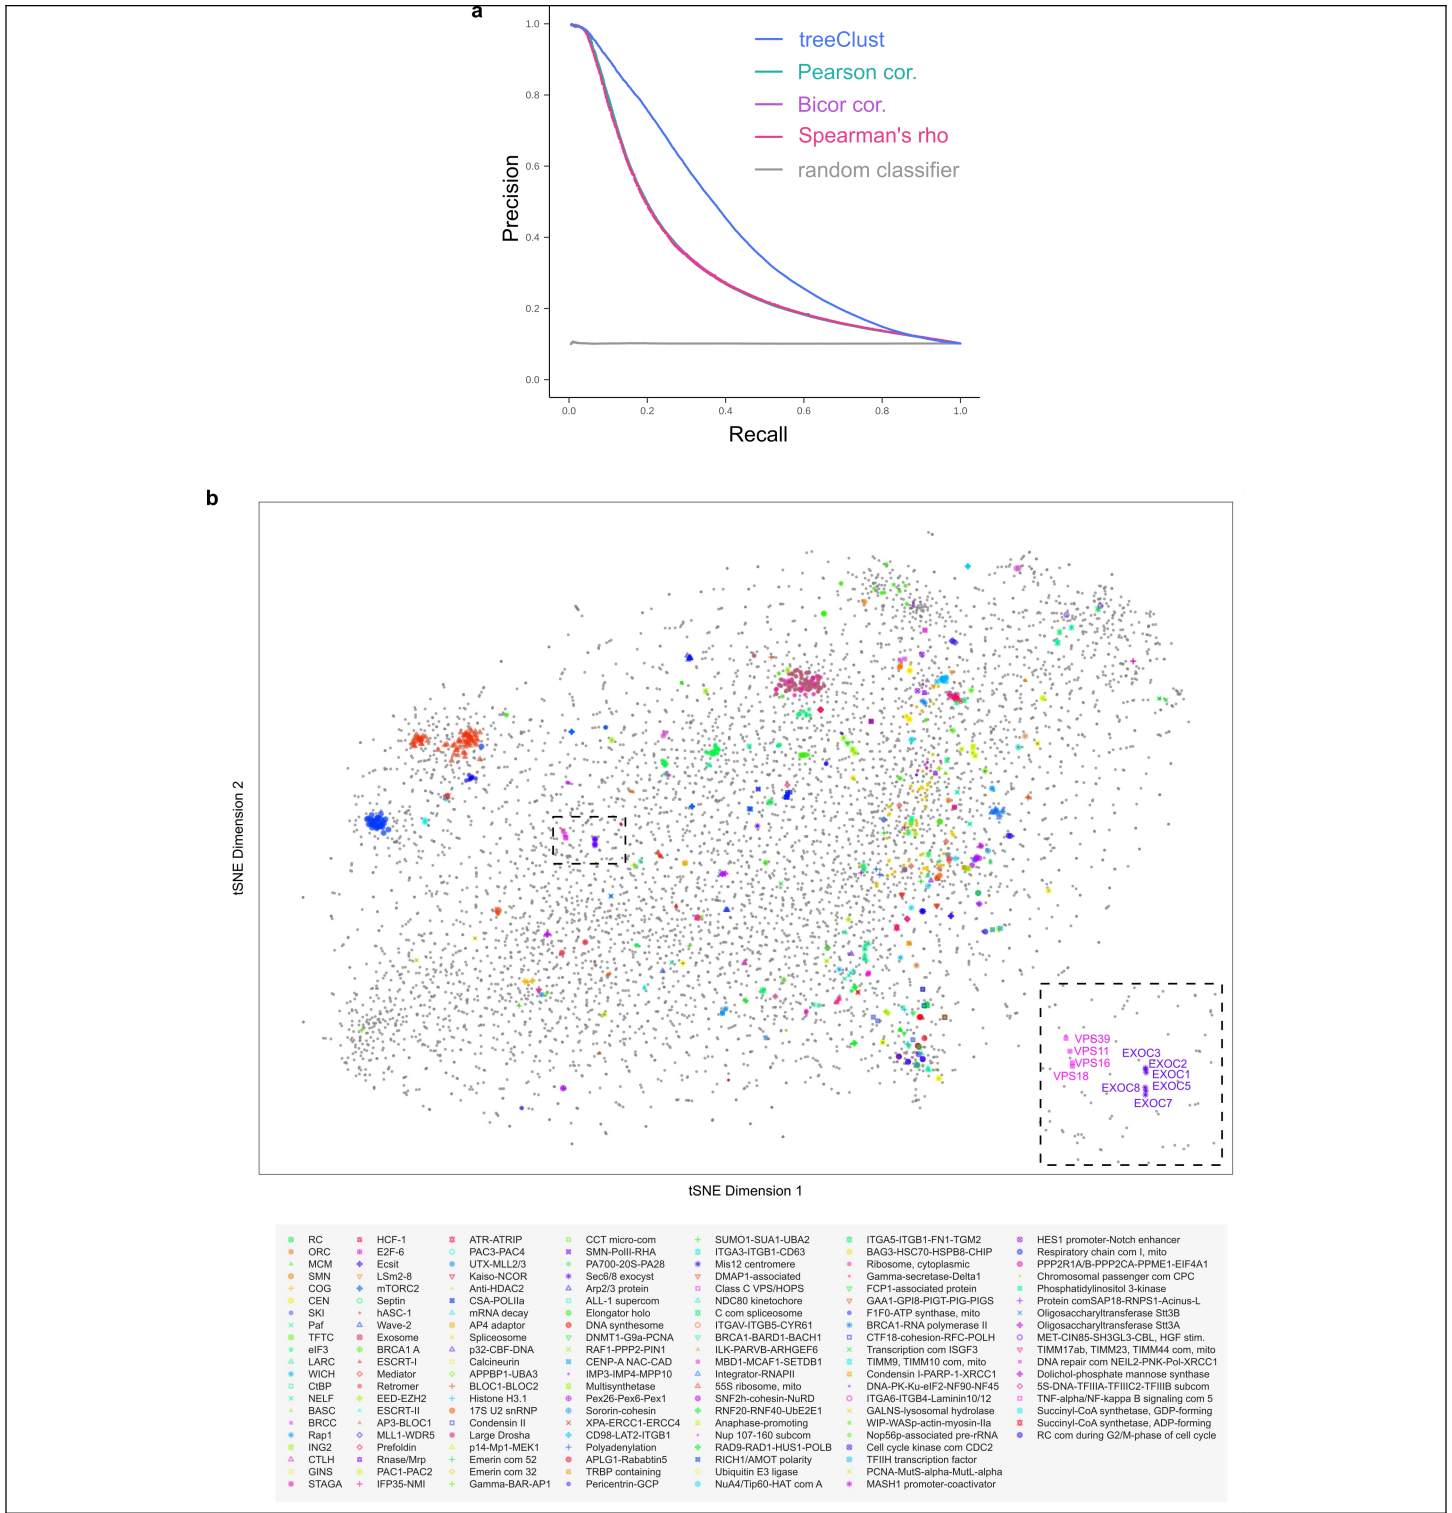

## Supplementary Figure 14

### Validation of treeClust and t-SNE on an independent proteomics dataset

(a) treeClust was applied to the TMT-based cancer proteomics dataset from Lapek *et al* (Nature Biotechnology, 2017). It outperforms Pearson, Spearman and Bicolor correlation, as shown by a Precision-Recall analysis using Reactome annotations as the gold standard.

Note that treeClust builds only one decision tree per condition, i.e. 41 trees on this dataset, too few for a standard analysis. Therefore treeClust was performed iteratively, obtaining the mean co-regulation score of 100 treeClust forests, each generated from 10 random experiments. **(b)** Co-regulation map for the Lapek *et al* dataset, made by t-SNE from treeClust scores. As in the correlation network of the original report (Fig. 2 in Lapek *et al*), CORUM protein complexes are colored. In contrast to a network, there is not a limited number of arbitrarily arranged, pairwise links, but the position of each protein reflects its similarity or dissimilarity to all other proteins in the map. This makes it possible to place all proteins in a functional context, not just those that are directly linked to members of the core network. It also allows for a hierarchical analysis of protein associations, with increasing distances indicating weaker co-regulation. For example the subunits of the protein complexes in the enlarged map area (inset) are clustered together, and the distances between the complexes are larger. However, all complexes have roles in vesicular trafficking. n = 6,151 proteins shown in plot.

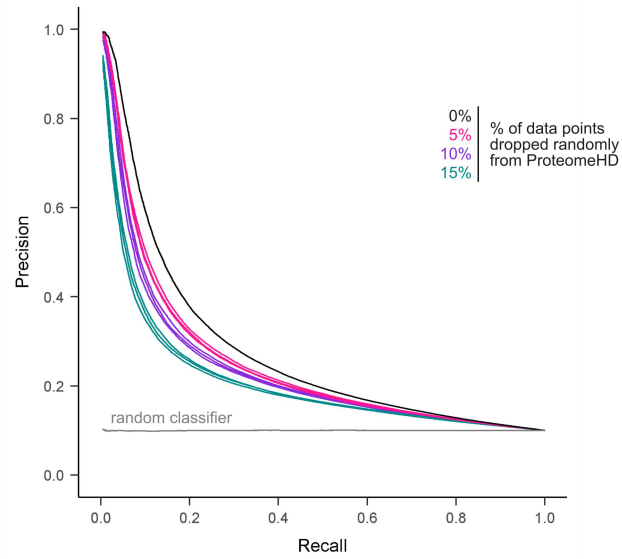

### Supplementary Figure 15

#### Information content of ProteomeHD has not reached saturation yet

We randomly removed 5%, 10% and 15% of the data points across the ProteomeHD matrix, in triplicate, and repeated treeClust learning to predict protein associations. The Precision-Recall analysis shows that removing data points decreases performance proportionally to the amount of removed data, suggesting that adding additional data would likely enhance performance further.
